# Supplementary material
Source: PubMed Central journal article supplement (PMC4288691)
Supplement: JB.02246-14_zjb999093416so1.pdf [file JB.02246-14_zjb999093416so1.pdf]

## Supplemental Material

### Supplemental Tables

**Table S1.** Strains used in this study.

| Strain                           | Genotype                                         | Reference         |
|----------------------------------|--------------------------------------------------|-------------------|
| <b><i>E. coli</i> strains</b>    |                                                  |                   |
| S17-1 $\lambda$ <i>pir</i>       | Wild-type                                        | (1)               |
| BL21(DE3)                        | Wild-type                                        | Life Technologies |
| DH10B                            | Wild-type                                        | Life Technologies |
| <b><i>V. harveyi</i> strains</b> |                                                  |                   |
| BB120                            | Wild-type                                        | (3)               |
| BB721                            | $\Delta luxO::kan^R$ (Kanamycin resistance gene) | (4)               |
| JAF548                           | <i>luxO</i> D47E:: $kan^R$                       | (4)               |
| KM669                            | $\Delta luxR$                                    | (2)               |
| JC2212                           | $\Delta betI$                                    | This study        |
| JC2216                           | $\Delta luxO::kan^R \Delta betI$                 | This study        |
| JC2214                           | <i>luxO</i> D47E:: $kan^R \Delta betI$           | This study        |
| JC2194                           | $\Delta qrr1-5 \Delta luxR \Delta betI$          | This study        |
| JS202                            | $\Delta qrr1-5 \Delta luxR$                      | (5)               |
| JV48                             | $\Delta aphA$                                    | (5)               |

**Table S2.** Plasmids used in this study.

| Name    | Description                                                                                                                                                                                                                                                                                            | Reference  |
|---------|--------------------------------------------------------------------------------------------------------------------------------------------------------------------------------------------------------------------------------------------------------------------------------------------------------|------------|
| pET28b  | Expression vector, 6x-His, <i>kan<sup>R</sup></i>                                                                                                                                                                                                                                                      | Novagen    |
| pEVS143 | <i>P<sub>tac</sub></i> promoter vector, p15a origin, <i>kan<sup>R</sup></i>                                                                                                                                                                                                                            | (7)        |
| pJC420  | <i>betI</i> region (~2.5 kbp upstream and 2.5 kbp downstream of the <i>betI</i> ORF) in pLAFR2                                                                                                                                                                                                         | This study |
| pJC430  | <i>betI</i> deletion cosmid constructed from pJC420. The <i>betI</i> gene was deleted by replacement with a chloramphenicol cassette ( <i>cm<sup>R</sup></i> ) using recombineering (8). The <i>cm<sup>R</sup></i> was removed by FLP-mediated recombination (9). An ~100 bp scar remains at the site. | This study |
| pJV021  | <i>cm<sup>R</sup></i> removed from the <i>gfp-cm<sup>R</sup></i> expression cassette in pEVS143                                                                                                                                                                                                        | This study |
| pJV036  | <i>P<sub>tac</sub></i> promoter vector, ColE1 origin, <i>kan<sup>R</sup></i>                                                                                                                                                                                                                           | (10)       |
| pJV079  | LuxR in pET28b for expression                                                                                                                                                                                                                                                                          | (10)       |
| pJV239  | <i>P<sub>tac</sub>-luxR</i> , in pJV036                                                                                                                                                                                                                                                                | (10)       |
| pJV298  | <i>cm<sup>R</sup></i> cloned in place of <i>kan<sup>R</sup></i> in pJV021                                                                                                                                                                                                                              | This study |
| pJV299  | <i>cm<sup>R</sup></i> cloned in place of <i>kan<sup>R</sup></i> in pSQ005                                                                                                                                                                                                                              | This study |
| pJV302  | <i>betIBA-proXWV</i> operon and promoter region in pLAFR2                                                                                                                                                                                                                                              | This study |
| pJV305  | LuxR BS1 deleted in pJV300                                                                                                                                                                                                                                                                             | This study |
| pJV306  | LuxR BS2 deleted in pJV300                                                                                                                                                                                                                                                                             | This study |
| pKM699  | pLAFR2 containing <i>luxR</i> from a 2.3-kbp HindIII fragment                                                                                                                                                                                                                                          | (11)       |
| pLAFR2  | Cosmid vector used for constructing mutant strains of <i>V. harveyi</i>                                                                                                                                                                                                                                | (12-14)    |
| pSQ004  | <i>His-betI</i> in pET28b for expression                                                                                                                                                                                                                                                               | This study |
| pSQ005  | <i>P<sub>tac</sub>-betI</i> in pEVS143                                                                                                                                                                                                                                                                 | This study |

**Table S3.** Oligonucleotides used in this study.

| Name                  | Sequence                     | Notes  |
|-----------------------|------------------------------|--------|
| hfq qRT-PCR Forward   | CGTGAGCGTATCCCGGTATCTAT      |        |
| hfq qRT-PCR Reverse   | TTGCAGTTTGATACCGTTCACAAG     | JCV737 |
| qrr1 qRT-PCR Forward  | CTCGGGTCACCTATCCAACCTGA      |        |
| qrr1 qRT-PCR Reverse  | TCGGATCTATTGGCTCGTTCTG       |        |
| qrr2 qRT-PCR Forward  | CAATTAGGGCGATTGGCTTATGT      |        |
| qrr2 qRT-PCR Reverse  | CTTAAGCCGAGGGTCACCTAGC       |        |
| qrr3 qRT-PCR Forward  | ACAAATTCGAGTCCACTAACAACGT    |        |
| qrr3 qRT-PCR Reverse  | CTTAAGCCGAGGGTCACCTAGC       |        |
| qrr4 qRT-PCR Forward  | GTTGATTGGCGGTATATACTTGTG     |        |
| qrr4 qRT-PCR Reverse  | CCTTATTAAGCCGAGGGTCAC        |        |
| qrr5 qRT-PCR Forward  | GACGTTGTTAGTGAACCCAATTGTT    |        |
| qrr5 qRT-PCR Reverse  | CACAAGGTTTGTGATTGGCTGTATA    |        |
| aphA qRT-PCR Forward  | GATTGAAGACATGTCATTACCACAC    | JCV743 |
| aphA qRT-PCR Reverse  | GAAGTAACCGATGCTAGCTGA        | JCV744 |
| luxC qRT-PCR Forward  | TGTTCAATTAACCTCAGATGGTGA     |        |
| luxC qRT-PCR Reverse  | TTCTTCTTGAATACTCTTCGCTCTT    |        |
| luxO qRT-PCR Forward  | GCATTCCTGATCTTATTCTGCTCG     |        |
| luxO qRT-PCR Reverse  | TCCATCCCCGTATATCAGGTA        |        |
| luxR qRT-PCR Forward  | GCAAAGAGACCTCGTACTAGG        | JCV745 |
| luxR qRT-PCR Reverse  | GCGACGAGCAAACACTTC           | JCV746 |
| qRT-PCR 06176 Forward | ATGGATGCAATTACGATTGAAAACC    | SQ096  |
| qRT-PCR 06176 Reverse | TAAATCCAGCCTCCTTCGTG         | SQ097  |
| qRT-PCR 06177 Forward | GTGAATTTTATTACGGACAACAACTTCC | SQ098  |
| qRT-PCR 06177 Reverse | TACACCGCAGCATTTCCTTT         | SQ099  |
| qRT-PCR 06178 Forward | ATGACAAAAATCTTTTCATCTATCGCG  | SQ100  |
| qRT-PCR 06178 Reverse | TAAGTGGATGCCAACCATGG         | SQ101  |
| qRT-PCR 06179 Forward | GACAAGAGCATCTTCATTCAAATGC    | SQ021  |
| qRT-PCR 06179 Reverse | GTCTAACCCTCTTCCGC            | SQ022  |
| qRT-PCR 06180 Forward | GCGAATGTGAAGCAGGC            | SQ019  |
| qRT-PCR 06180 Reverse | TTTGCCCGTATCTGCCA            | SQ020  |

---

|                                 |                                                |        |
|---------------------------------|------------------------------------------------|--------|
| qRT-PCR 06181 Forward           | GTTGGGATGCCTGAAATCAGA                          | JCV339 |
| qRT-PCR 06181 Reverse           | GCTTCTTTGCTGATCAACGAG                          | JCV340 |
| <i>P<sub>betI</sub></i> Reverse | CAACCTTGGGCATTTTACATCCTTGTTATTTTTAATTG         | SQ94   |
| <i>P<sub>betI</sub></i> Forward | CCTTCACTCAATTGACAATTCTAAAAGTAAAACGTGCTGAAATTAT | SQ113  |
| <i>P<sub>betI</sub></i> A       | CCTTCACTCAATTGACAATTCTAAAAGTAAAACGTGCTGAAATTA  | JCV977 |
| <i>P<sub>betI</sub></i> A       | TAATTTCAAGCACGTTTTACTTTTAGAATTGTCAATTGAGTGAAGG | JCV978 |
| <i>P<sub>betI</sub></i> B       | GCTGAAATTATTTGAGTTCATTGTATTTGTCTTTATTTATACTTT  | JCV979 |
| <i>P<sub>betI</sub></i> B       | AAAGTATAAATAAAGACAAATACAATGAACTCAAATAATTTTCAGC | JCV980 |
| <i>P<sub>betI</sub></i> C       | TTTATACTTTTGATGCGCACGAATTGCTCATGAGCTGGTATCTCT  | JCV981 |
| <i>P<sub>betI</sub></i> C       | AGAGATACCAGCTCATGAGCAATTCGTGCGCATCAAAGTATAAA   | JCV982 |
| <i>P<sub>betI</sub></i> D       | TGGTATCTCTATAACTTGCATTAATGTAGTTTAGTTTCTGATTA   | JCV983 |
| <i>P<sub>betI</sub></i> D       | TAATCAGAAACTAACTACATTTAATGCAAGTTATAGAGATACCA   | JCV984 |
| <i>P<sub>betI</sub></i> E       | TTTCTGATTATTATGGTTTTTGTCTTTTCTGTTTTTACGTGTTAAA | JCV985 |
| <i>P<sub>betI</sub></i> E       | TTTAACACGTAAAAACAGAAAAACAAAACCATAATAATCAGAAA   | JCV986 |
| <i>P<sub>betI</sub></i> F       | ACGTGTTAAATCTTCGTAATCTATCTTTTCTCAAGTTTTAGTA    | JCV987 |
| <i>P<sub>betI</sub></i> F       | TACTAAAACCTTGAGAAAAGATAGATTTTACGAAGATTTAACACGT | JCV988 |
| <i>P<sub>betI</sub></i> G       | AGTTTTAGTAATGATTGTAGTCGAAATGATTCGGCTGTATCTGTC  | JCV989 |
| <i>P<sub>betI</sub></i> G       | GACAGATACAGCCGAATCATTTGACTACAATCATTACTAAAACCT  | JCV990 |
| <i>P<sub>betI</sub></i> H       | TGTATCTGTCATTTTTTCTAGATAATTAGTTTGAGTTAGAACTAA  | JCV991 |
| <i>P<sub>betI</sub></i> H       | TTAGTTCTAACTCAAATAATTATCTAGAAAAAATGACAGATACA   | JCV992 |
| <i>P<sub>betI</sub></i> I       | TTAGTTTGAGTTAGAACTAAATTTAAGGCATTTTA            | JCV993 |
| <i>P<sub>betI</sub></i> I       | TAAAATGCCTTAAATTTAGTTCTAACTCAAATAA             | JCV994 |
| <i>P<sub>betI</sub></i> J       | AGGCATTTTATATTTAACTAACCGTTCAATTAATAAACAAGGA    | JCV995 |
| <i>P<sub>betI</sub></i> J       | TCCTTGTTATTTTTAATTGAACGGTTAGTTAAATATAAAATGCCT  | JCV996 |
| <i>P<sub>betI</sub></i> K       | ATAACAAGGATGTAAATGCCCAAGGTT                    | JCV997 |
| <i>P<sub>betI</sub></i> K       | AACCTTGGGCATTTTACATCCTTGTTAT                   | JCV998 |
| <i>recA</i> Forward             | CAATAAACGCACAAGTTTTGCCTTC                      | SQ110  |
| <i>recA</i> Forward             | ATGAATAAATCGGAGAAAGTAATGGACGA                  | SQ104  |
| <i>P<sub>qrr3</sub></i> Forward | ATCATTAGCATTATAATTACAAATTGCA                   | STR725 |
| <i>P<sub>qrr3</sub></i> Reverse | ATGATGCAGTTAGTGTGCCAACTT                       | STR726 |
| <i>P<sub>qrr4</sub></i> Forward | TTTCTTATTAACGCCATTTTTCTGATA                    | STR727 |
| <i>P<sub>qrr4</sub></i> Reverse | AGCACGATGCGTGCCAACTTT                          | STR422 |

---

---

|                                             |                                   |        |
|---------------------------------------------|-----------------------------------|--------|
| <i>P<sub>betI</sub></i> LuxR binding site 1 | CACTCAATTGACAATTCTAAAAGTAAAACGT   | JCV424 |
| <i>P<sub>betI</sub></i> LuxR binding site 1 | ACGTTTTACTTTTAGAATTGTCAATTGAGTG   | JCV425 |
| <i>P<sub>betI</sub></i> LuxR binding site 2 | TTTTATATTTAACTAACCGTTCAATTA AAAAT | JCV426 |
| <i>P<sub>betI</sub></i> LuxR binding site 2 | ATTTTTAATTGAACGGTTAGTTAAATATAAAA  | JCV427 |

---

## Supplemental References

1. **de Lorenzo V, Timmis KN.** 1994. Analysis and construction of stable phenotypes in gram-negative bacteria with Tn5- and Tn10-derived minitransposons. *Methods Enzymol* **235**:386-405.
2. **Pompeani AJ, Irgon JJ, Berger MF, Bulyk ML, Wingreen NS, Bassler BL.** 2008. The *Vibrio harveyi* master quorum-sensing regulator, LuxR, a TetR-type protein is both an activator and a repressor: DNA recognition and binding specificity at target promoters. *Mol Microbiol* **70**:76-88.
3. **Bassler BL, Greenberg EP, Stevens AM.** 1997. Cross-species induction of luminescence in the quorum-sensing bacterium *Vibrio harveyi*. *J Bacteriol* **179**:4043-4045.
4. **Freeman JA, Bassler BL.** 1999. A genetic analysis of the function of LuxO, a two-component response regulator involved in quorum sensing in *Vibrio harveyi*. *Mol Microbiol* **31**:665-677.
5. **Rutherford ST, van Kessel JC, Shao Y, Bassler BL.** 2011. AphA and LuxR/HapR reciprocally control quorum sensing in vibrios. *Genes Dev* **25**:397-408.
6. **Skerra A.** 1994. Use of the tetracycline promoter for the tightly regulated production of a murine antibody fragment in *Escherichia coli*. *Gene* **151**:131-135.
7. **Dunn AK, Millikan DS, Adin DM, Bose JL, Stabb EV.** 2006. New rfp- and pES213-derived tools for analyzing symbiotic *Vibrio fischeri* reveal patterns of infection and *lux* expression in situ. *Appl Environ Microbiol* **72**:802-810.
8. **Datsenko KA, Wanner BL.** 2000. One-step inactivation of chromosomal genes in *Escherichia coli* K-12 using PCR products. *Proc Natl Acad Sci U S A* **97**:6640-6645.
9. **Long T, Tu KC, Wang Y, Mehta P, Ong NP, Bassler BL, Wingreen NS.** 2009. Quantifying the integration of quorum-sensing signals with single-cell resolution. *PLoS Biol* **7**:e68.
10. **van Kessel JC, Rutherford ST, Shao Y, Utria AF, Bassler BL.** 2013. Individual and Combined Roles of the Master Regulators AphA and LuxR in Control of the *Vibrio harveyi* Quorum-Sensing Regulon. *J Bacteriol* **195**:436-443.
11. **Waters CM, Bassler BL.** 2006. The *Vibrio harveyi* quorum-sensing system uses shared regulatory components to discriminate between multiple autoinducers. *Genes Dev* **20**:2754-2767.
12. **Ditta G, Stanfield S, Corbin D, Helinski DR.** 1980. Broad host range DNA cloning system for gram-negative bacteria: construction of a gene bank of *Rhizobium meliloti*. *Proc Natl Acad Sci U S A* **77**:7347-7351.
13. **Figurski DH, Helinski DR.** 1979. Replication of an origin-containing derivative of plasmid RK2 dependent on a plasmid function provided *in trans*. *Proc Natl Acad Sci U S A* **76**:1648-1652.
14. **Friedman AM, Long SR, Brown SE, Buikema WJ, Ausubel FM.** 1982. Construction of a broad host range cosmid cloning vector and its use in the genetic analysis of *Rhizobium* mutants. *Gene* **18**:289-296.

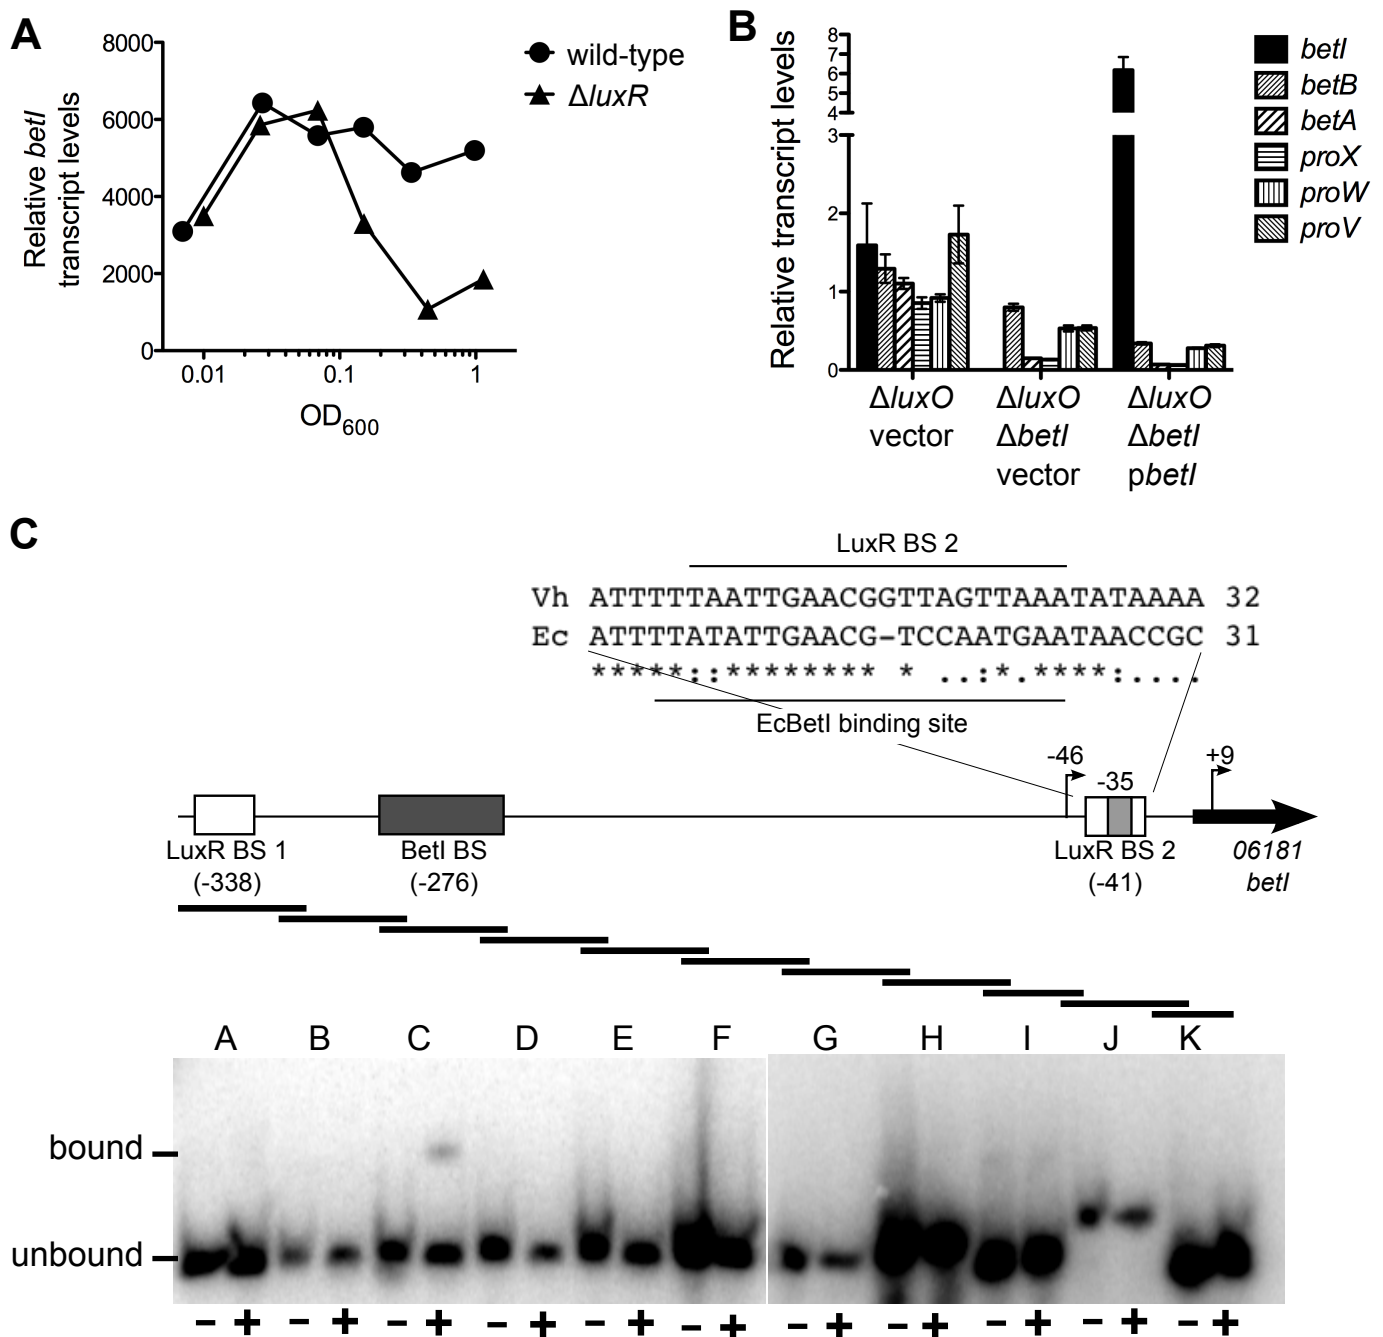

**Figure S1.** (A) Transcript levels of *betI* measured by microarrays are shown for *V. harveyi* wild-type (BB120) and *V. harveyi*  $\Delta luxR$  (KM669) and were determined previously (8). (B) Transcript levels of *betI**BA-proXWV* genes were assayed by qRT-PCR in *V. harveyi* in the following strains induced with 10  $\mu$ M IPTG:  $\Delta luxO$  carrying a control vector (BB721::pJV298),  $\Delta luxO$   $\Delta betI$  carrying a control vector (JC2216::pJV298), and  $\Delta luxO$   $\Delta betI$  carrying a vector expressing *betI* from an IPTG-inducible promoter (JC2216::pJV299). Error bars represent the standard error of measurement from three biological replicates, and these data represent two independent experiments. (C) Alignment of the predicted BetI binding site sequences for *V. harveyi* (Vh) and *E. coli* (Ec) with EMSAs. The location of the predicted BetI binding site overlaps LuxR binding site 2 (BS2, see Figure 2, main text). The positions of the binding sites, transcription start sites, and -35 site (gray box) are indicated relative to the translation start codon of *betI*. Asterisks indicate nucleotide identity. EMSAs contain 0 nM (-) or 1000 nM (+) His-BetI incubated with radiolabeled DNA substrates corresponding to the fragments A through K in the diagram.

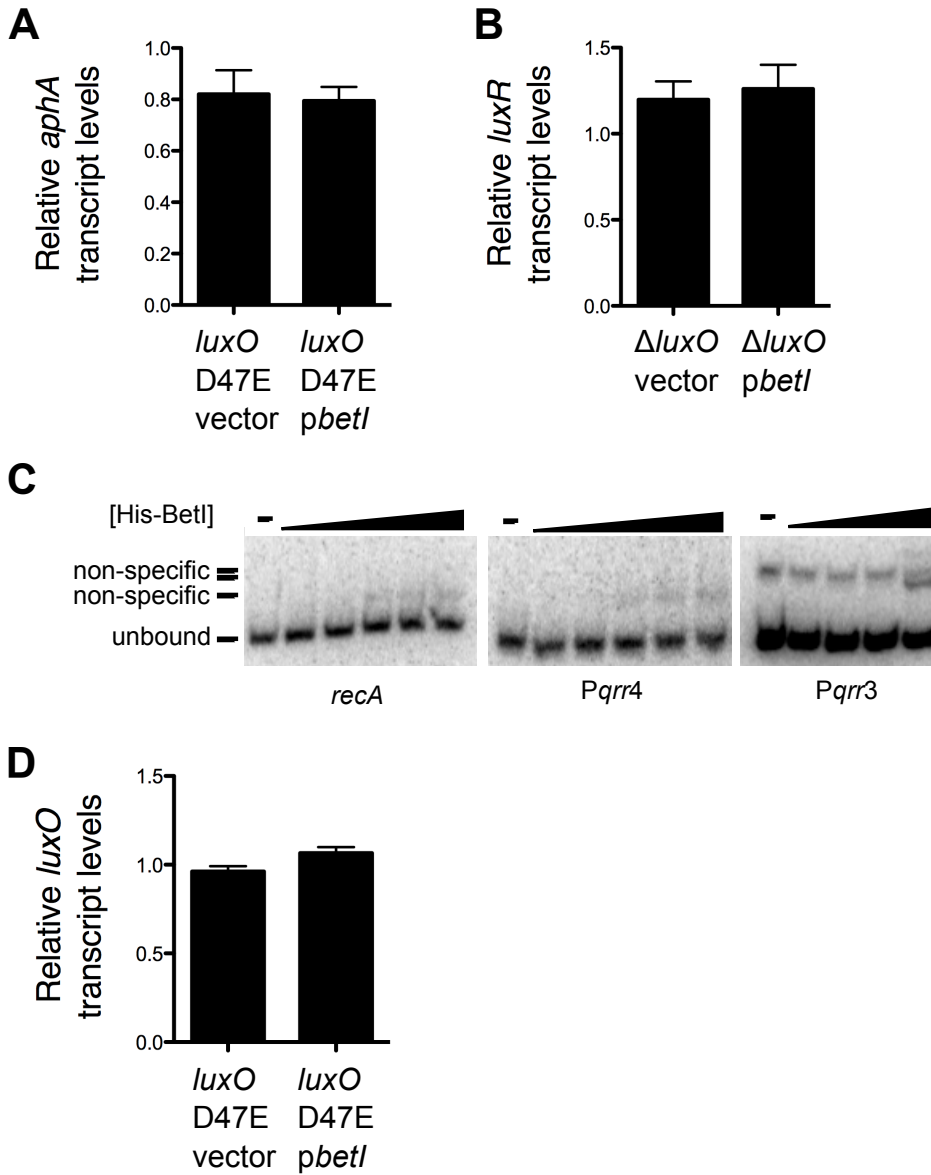

**Figure S2.** (A, B, D) Transcript levels of *aphA* (A), *luxR* (B), and *luxO* (D) were assayed by qRT-PCR in *V. harveyi* strains induced with 1 mM IPTG. Error bars represent the standard error of measurement from three biological replicates, and these data represent two independent experiments. The strains are: (A,D) *V. harveyi luxO* D47E carrying a control vector (JAF548::pJV298) and carrying a vector expressing *betI* from an IPTG-inducible promoter (JAF548::pJV299); (B) The *V. harveyi*  $\Delta luxO$  strain carrying a control vector (BB721::pJV298) and carrying a vector expressing *betI* from an IPTG-inducible promoter (BB721::pJV299). (C) EMSAs with His-BetI incubated with radiolabeled DNA substrates corresponding to the *recA* ORF (300 bp), the *qrr3* promoter (*Pqrr3*; 133 bp), or the *qrr4* promoter (*Pqrr4*; 177 bp). The reactions for *recA* and *Pqrr4* contained 0, 1000 nM, 2000 nM, 4000 nM, 6000 nM, or 8000 nM His-BetI, and the reactions for *qrr3* contained 0, 250 nM, 500 nM, 1000 nM, and 5000 nM His-BetI.



**A**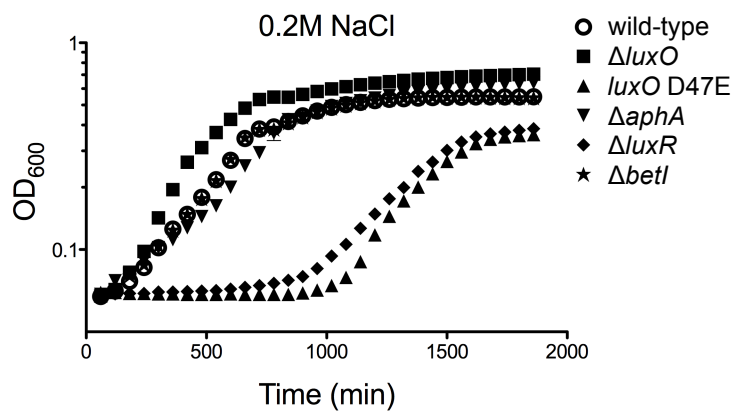**B**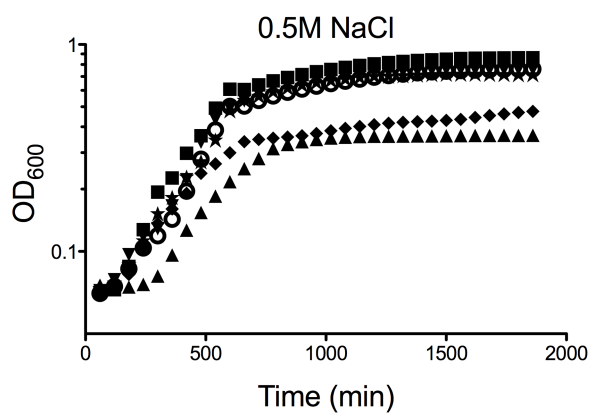**C**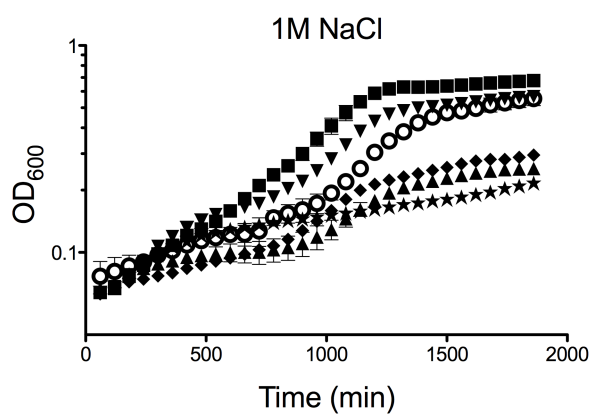

**Figure S3.** *V. harveyi* strains were grown in LOM containing choline and 0.2 M, 0.5 M, or 1 M NaCl. Strains are *V. harveyi* wild-type (BB120),  $\Delta luxO$  (BB721), *luxO* D47E (JAF548),  $\Delta aphA$  (JV48),  $\Delta luxR$  (KM669), and  $\Delta betI$  (JC2212).
